# Supplementary material
Source: MDPI journal article supplement (https://www.mdpi.com/2072-4292/15/15/3891)
Supplement: s1 [file s1]

---

# Supplementary Information

## Vegetation Dynamics and Its Response to Extreme Climate on the Inner Mongolian Plateau during 1982–2020

Rihan Su <sup>1,2,\*</sup>, Enliang Guo <sup>1,2,\*</sup>, Yongfang Wang <sup>1,2,3</sup>, Shan Yin <sup>1,4</sup>, Yulong Bao <sup>1,4</sup>, Zhongyi Sun <sup>5</sup>, Naren Mandula <sup>1,2</sup> and Yuhai Bao <sup>1,4</sup>

<sup>1</sup> College of Geographical Science, Inner Mongolia Normal University, Hohhot 010022, China; surhnn@163.com (R.S.); yinshan@imnu.edu.cn (S.Y.); baoyulong@imnu.edu.cn (Y.B.); narenmandula@imnu.edu.cn (N.M.); baoyuhai@imnu.edu.cn (Y.B.)

<sup>2</sup> Inner Mongolia Key Laboratory of Disaster and Ecological Security on the Mongolian Plateau, Inner Mongolia Normal University, Hohhot 010022, China

<sup>3</sup> Provincial Key Laboratory of Mongolian Plateau's Climate System, Inner Mongolia Normal University, Hohhot 010022, China

<sup>4</sup> Inner Mongolia Key Laboratory of Remote Sensing and Geographic Information Systems, Inner Mongolia Normal University, Hohhot 010022, China

<sup>5</sup> Ecology and Environment College, Hainan University, Haikou 570208, China; gis.rs@hainanu.edu.cn

\* Correspondence: guoel1988@imnu.edu.cn; Tel.: +86-13081505377

**Table S1.** Definitions of extreme climate indices

| Category            | ID    | Name                  | Definition                                                  | Unit |
|---------------------|-------|-----------------------|-------------------------------------------------------------|------|
| Extreme temperature |       |                       |                                                             |      |
| Intensity indices   | TNn   | Min Tmin              | Monthly minimum value of daily minimum temperature          | °C   |
|                     | TXn   | Min Tmax              | Monthly maximum value of daily minimum temperature          | °C   |
|                     | TNx   | Max Tmin              | Monthly maximum value of daily minimum temperature          | °C   |
|                     | TXx   | Max Tmax              | Monthly maximum value of daily maximum temperature          | °C   |
| Frequency indices   | Tx90p | Warm days             | Count of days where TX>90 <sup>th</sup> percentile          | days |
|                     | Tn90p | Warm nights           | Count of days where TN>90 <sup>th</sup> percentile          | days |
|                     | Tx10p | Cold days             | Count of days where TX<10 <sup>th</sup> percentile          | days |
|                     | Tn10p | Cold nights           | Count of days where TN<10 <sup>th</sup> percentile          | days |
| Duration indices    | GSL   | Growing season length | Annual number of days between the first occurrence of       | days |
|                     |       |                       | 6 consecutive days with Tmean >5 °C and first occurrence of |      |
|                     |       |                       | consecutive 6 days with Tmean <5 °C                         |      |

---

|                       |        |                                    |                                                                  |    |
|-----------------------|--------|------------------------------------|------------------------------------------------------------------|----|
| Extreme precipitation |        |                                    |                                                                  |    |
| Intensity indices     | Rx1day | Maximum one-day precipitation      | Maximum precipitation amount in one-day period                   | mm |
|                       |        |                                    | Maximum total precipitation amount in consecutive five- day      |    |
|                       | Rx5day | Maximum five-day precipitation     | period                                                           | mm |
| Frequency indices     | R10    | Number of heavy precipitation days | Annual count of days when precipitation $\geq$ 10 mm             | d  |
|                       |        | Number of very heavy precipitation |                                                                  |    |
|                       | R20    | days                               | Annual count of days when precipitation $\geq$ 20 mm             | d  |
|                       |        |                                    | Maximum number of consecutive days with precipitation < 1        |    |
| Duration indices      | CDD    | Consecutive dry days               | mm                                                               | d  |
|                       | CWD    | Consecutive wet days               | Maximum number of consecutive days with precipitation $\geq$ 1mm | d  |

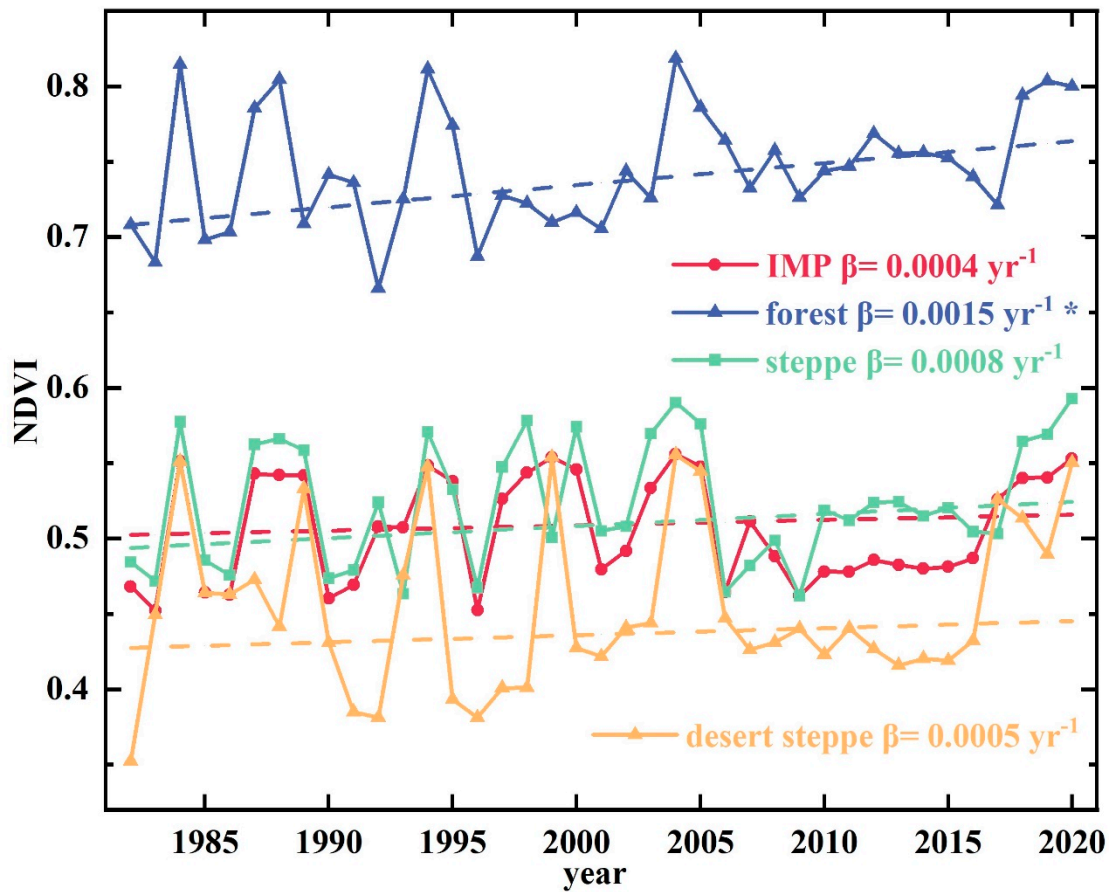

**Figure S1.** Changes in annual NDVI in the IMP during 1982–2020. Notes: “\*” indicates statistical significance at the 95% confidence level.

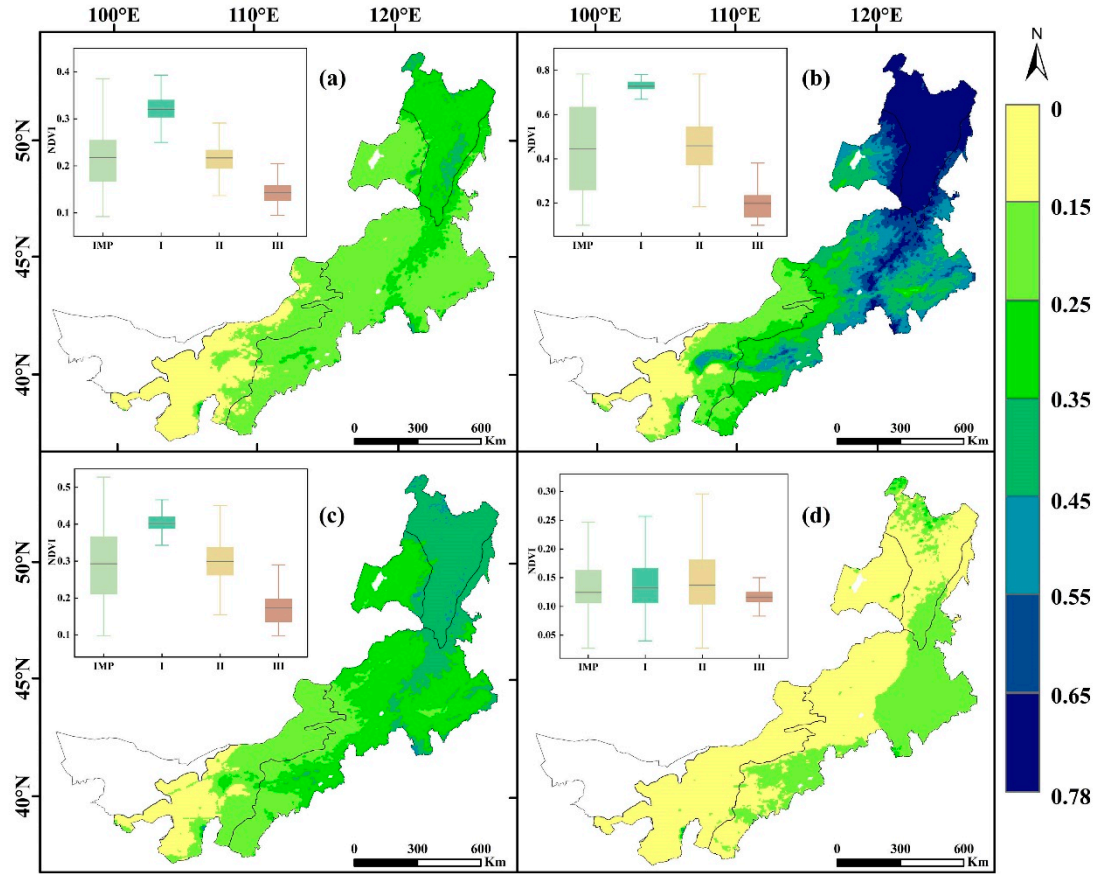

**Figure S2.** Spatial distribution of the seasonal Normalized Difference Vegetation Index (NDVI) on the Inner Mongolian Plateau (IMP) during 1982-2020 (a: spring; b: summer; c: autumn; d: winter). Notes: I, II and III represent forest, steppe and desert steppe, respectively. The gray line within the boxes shows the mean value of NDVI.

**Table S2.** Trend rates (unit:yr<sup>-1</sup>) of extreme climate indices in each ecological zone.

|        | forest         | steppe         | desert steppe  |
|--------|----------------|----------------|----------------|
| TNn    | 0.008          | -0.009         | -0.024         |
| TXn    | 0.023          | -0.017         | -0.046         |
| TNx    | <b>0.051*</b>  | <b>0.048*</b>  | <b>0.054*</b>  |
| TXx    | <b>0.083*</b>  | <b>0.058*</b>  | <b>0.040*</b>  |
| Tx90p  | <b>0.177*</b>  | <b>0.188*</b>  | <b>0.270*</b>  |
| Tn90p  | <b>0.185*</b>  | <b>0.227*</b>  | <b>0.302*</b>  |
| Tx10p  | <b>-0.115*</b> | <b>-0.105*</b> | <b>-0.098*</b> |
| Tn10p  | -0.078         | <b>-0.118*</b> | <b>-0.127*</b> |
| GSL    | <b>0.409*</b>  | <b>0.343*</b>  | <b>0.528*</b>  |
| Rx1day | 0.046          | -0.005         | 0.07           |
| Rx5day | 0.012          | -0.132         | 0.112          |
| R10    | 0.008          | -0.007         | 0.029          |
| R20    | 0              | -0.006         | 0.008          |
| CDD    | -0.023         | -0.321         | -0.177         |

|     |        |          |        |
|-----|--------|----------|--------|
| CWD | -0.013 | -0.011** | -0.002 |
|-----|--------|----------|--------|

Notes: “\*” indicates the significance at 95% confidence level.

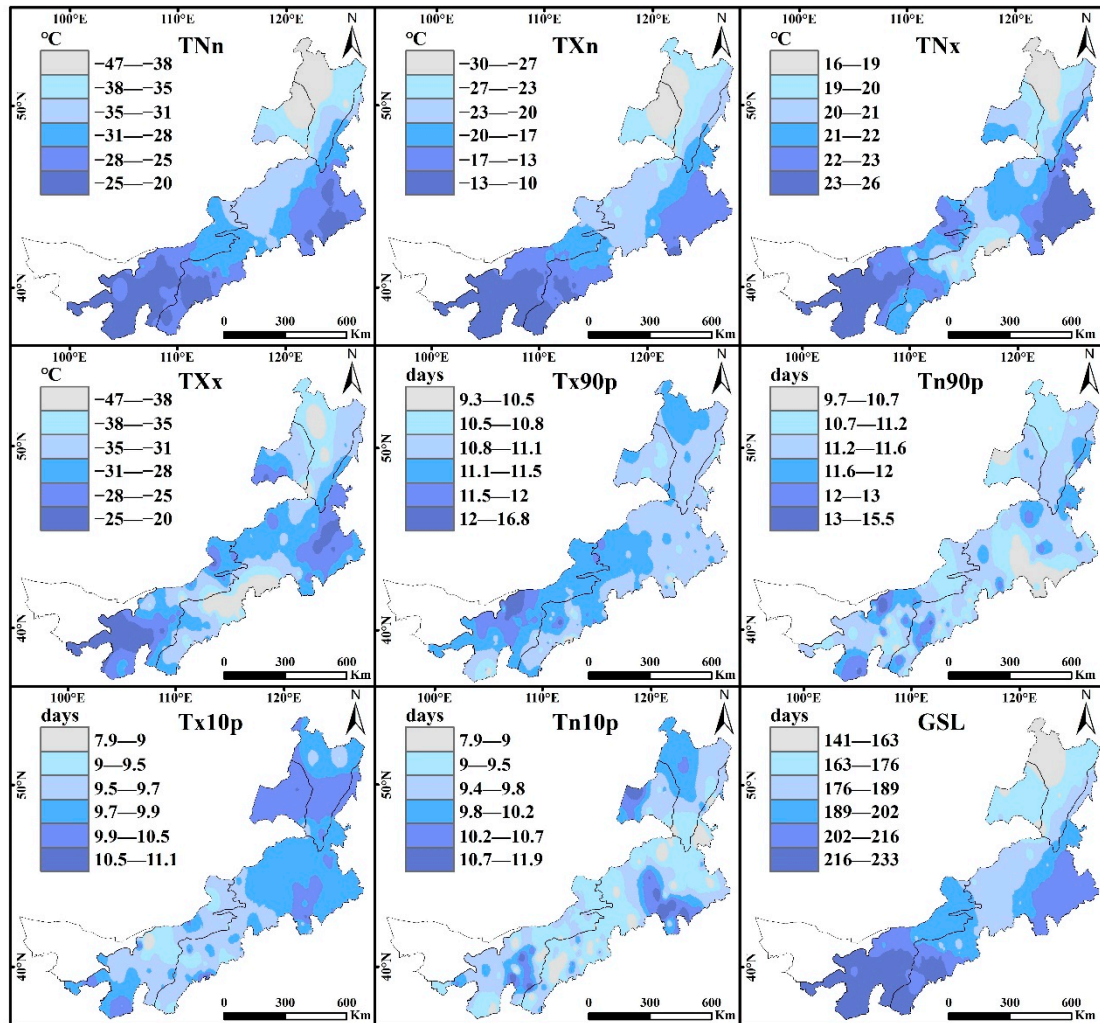

**Figure S3.** Spatial distribution of extreme temperature indices on the Inner Mongolian Plateau (IMP) during 1982-2020.

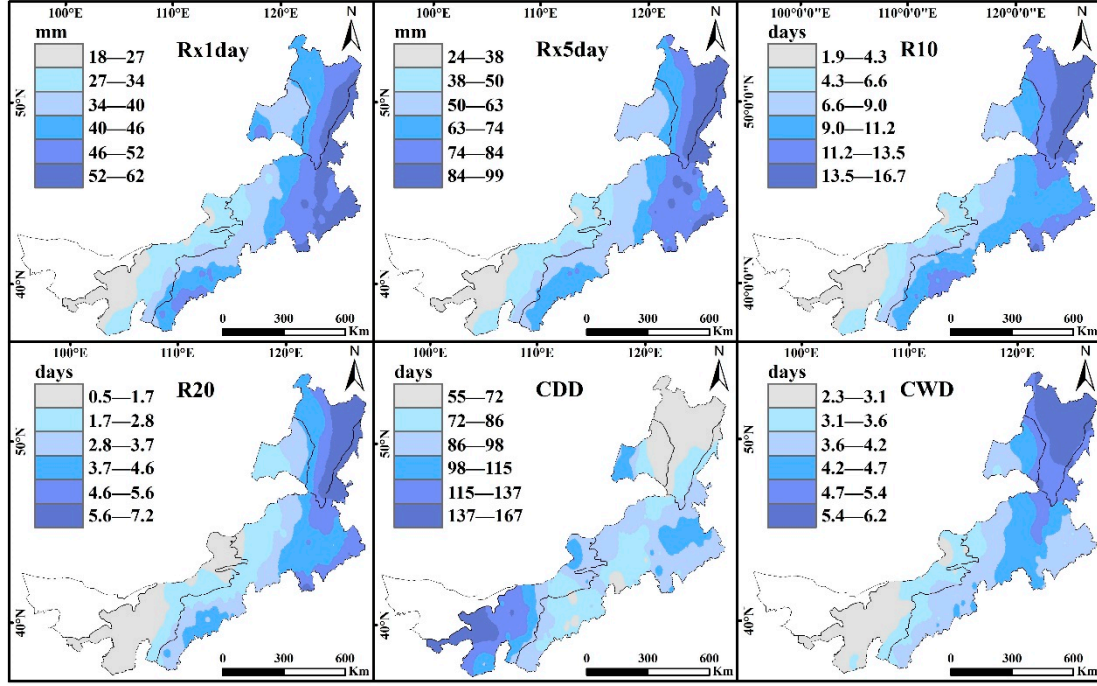

**Figure S4.** Spatial distribution of extreme precipitation indices on the Inner Mongolian Plateau (IMP) during 1982-2020.

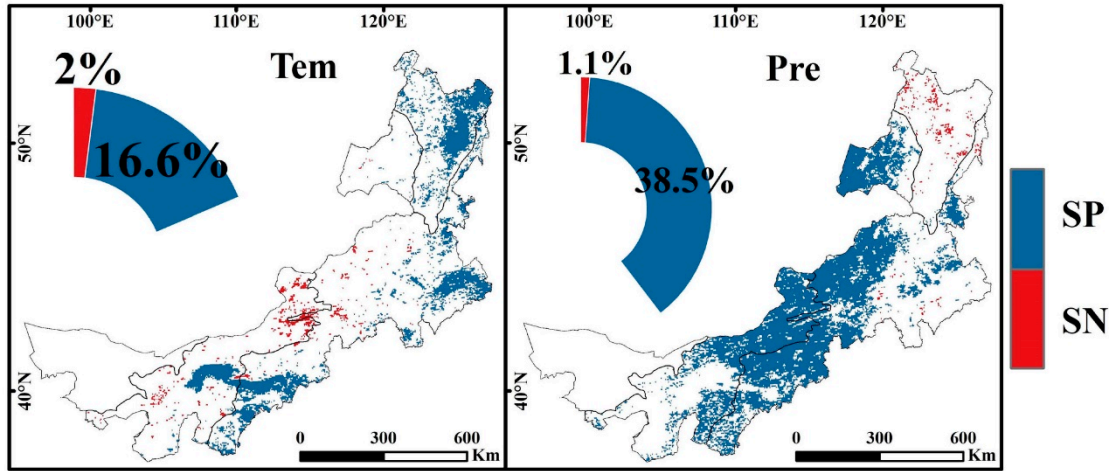

**Figure S5.** Correlation between annual Normalized Difference Vegetation Index (NDVI) and average climate. Notes: SP and SN means significant positive and significant negative, re-spectively.



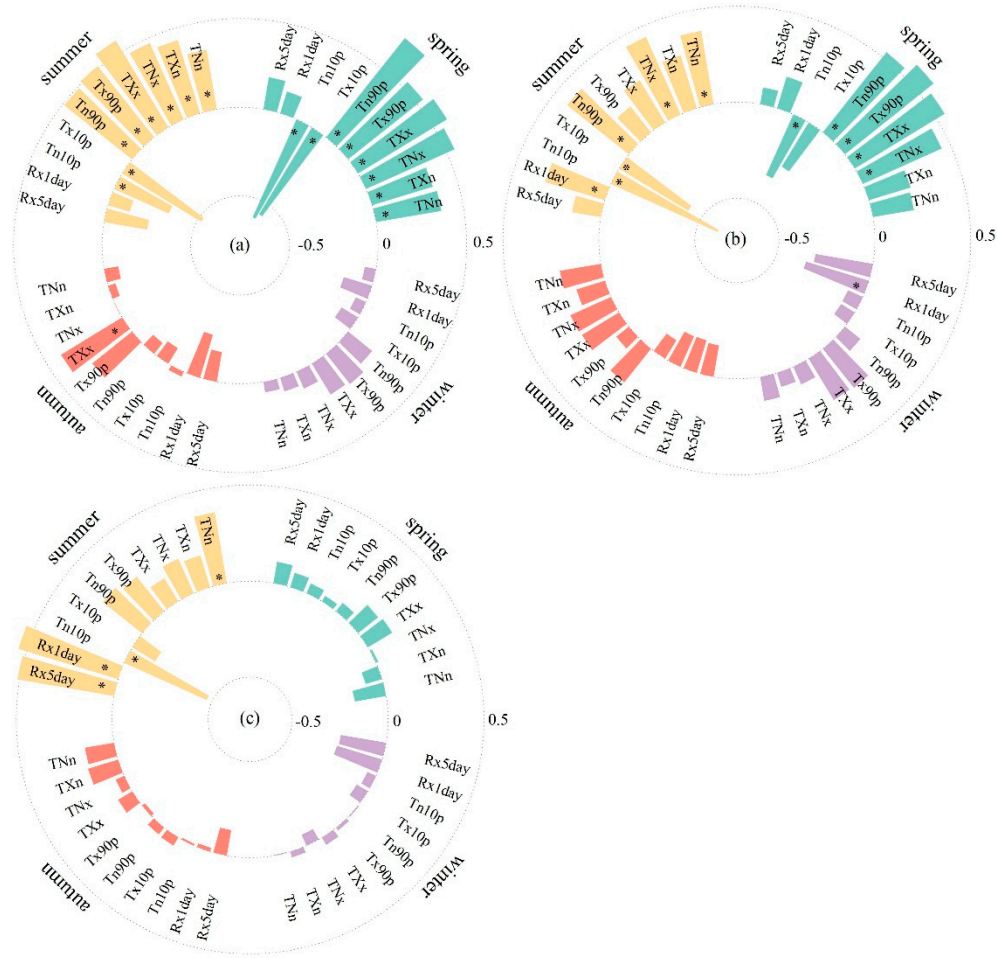

**Figure S6.** Correlation between seasonal Normalized Difference Vegetation Index (NDVI) and extreme climate indices in each ecological zone of the Inner Mongolian Plateau (IMP). (a) forest; (b) steppe; (c) desert steppe. Notes: " \*" indicates the correlation passed the 95% significance level.

**Table S3.** Correlation between seasonal Normalized Difference Vegetation Index (NDVI) and average climate in each ecological zone.

|               |     | spring        | summer        | autumn | winter         |
|---------------|-----|---------------|---------------|--------|----------------|
| forest        | Tem | <b>0.663*</b> | <b>0.653*</b> | 0.053  | 0.135          |
|               | Pre | 0.165         | -0.306        | -0.248 | -0.21          |
| steppe        | Tem | <b>0.487*</b> | <b>0.365*</b> | 0.192  | 0.134          |
|               | Pre | 0.172         | 0.155         | -0.171 | <b>-0.318*</b> |
| desert steppe | Tem | -0.004        | 0.206         | 0.006  | 0.037          |
|               | Pre | 0.129         | <b>0.471*</b> | -0.063 | -0.251         |

Notes: " \*" indicates the correlation passed the 95% significance level.

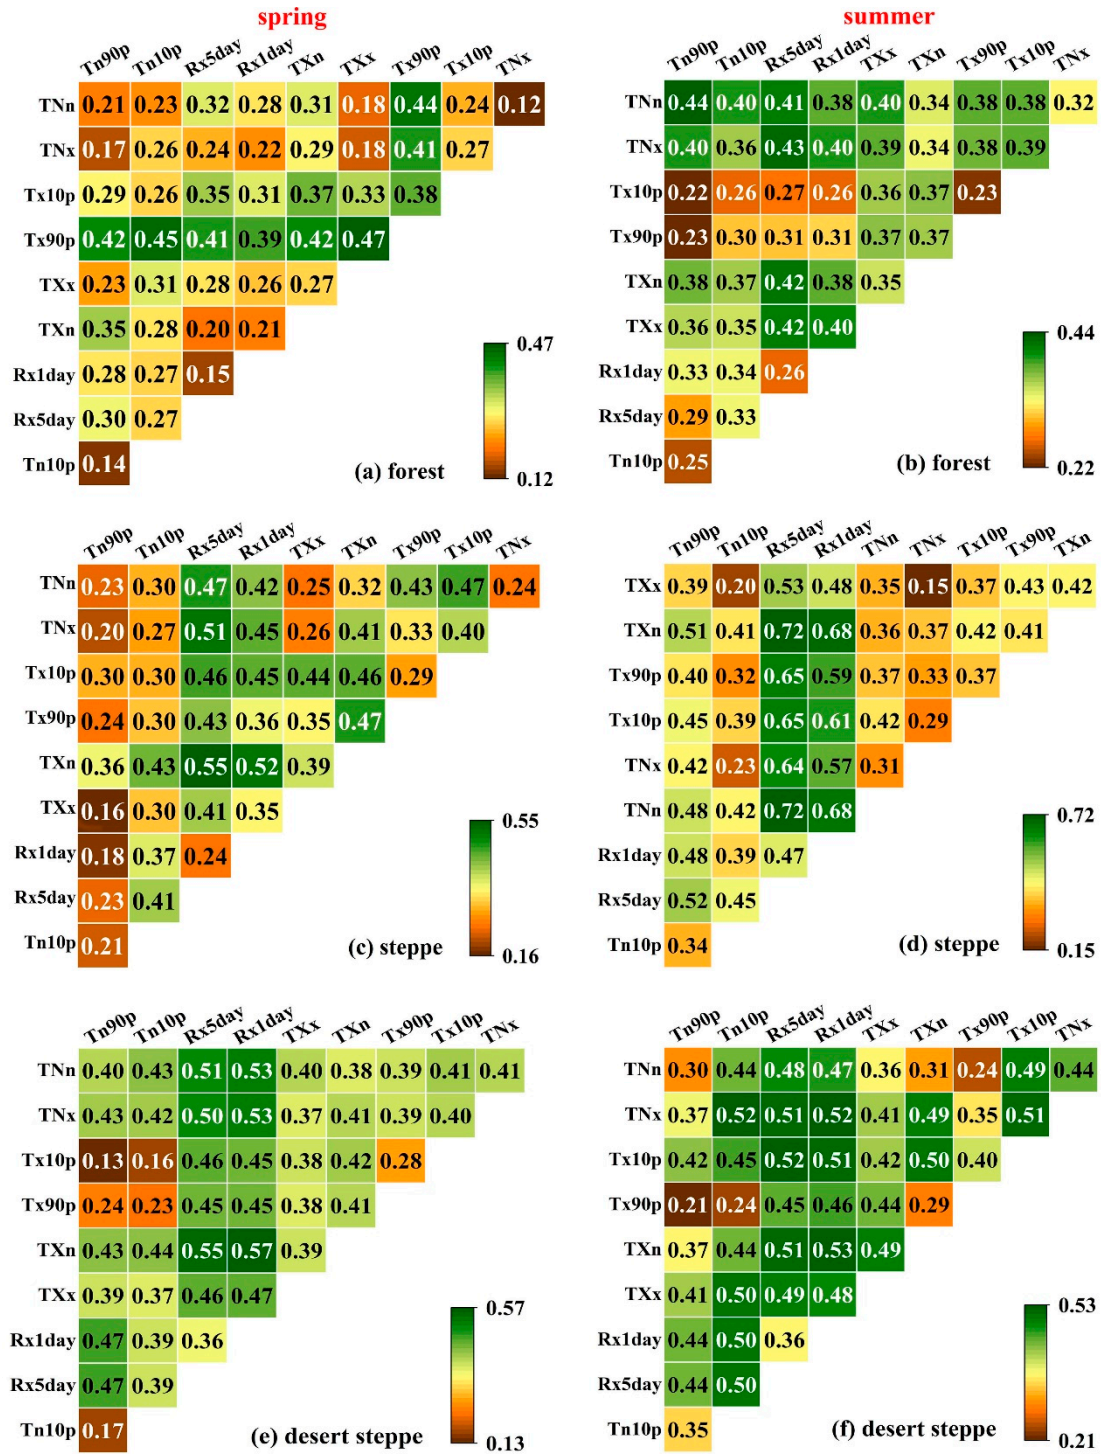

**Figure S7.** Interactive influence of different extreme climate indices on NDVI changes on a seasonal scale in each ecological zone of the IMP.
